# Supplementary material for: Generative Mechanisms Influencing Economic Decision Making in Digital Therapeutics Development
Source: Research Square preprint supplement (doi:10.21203/rs.3.rs-6797827/v1), 2025-06-10
Supplement: Supplementary file 1 [file c8e0e9f04e74113823ca79ff.pdf]

# Generative Mechanisms Influencing Economic Decision Making in Digital Therapeutics Development

Yoann Sapanel; L. Martin Cloutier; Alec Morton;  
Sapphire Lin; Gyula Seres; Dean Ho.

## Supplementary Information

Contents (in article order):

- **Supplementary Fig. 1:** Primary within-mechanism and secondary cross-mechanism loops in DTx development.
- **Supplementary Fig. 2:** Verbatim to codes, subthemes, and themes.
- **Supplementary Fig. 3:** Integrated theoretical framework for researchers' decision-making in DTx development (within Supplementary Note 1).
- **Supplementary Fig. 4:** Implementation of triangulation methodology for CLD construction in DTx decision-making (within Supplementary Note 4).
- **Supplementary Note 1:** Integrated theoretical framework.
- **Supplementary Note 2:** Detailed results from steps 1 and 2 of data analysis.
- **Supplementary Note 3:** Saldaña's cycles of coding methodology.
- **Supplementary Note 4:** Triangulation approach to validating mechanisms and mapping cause-effect relationships in DTx decision-making.
- **Supplementary Table 1:** Relevance of decision theory in the context of the research question (within Supplementary Note 1).
- **Supplementary Table 2:** Data analysis methodology summary.
- **Supplementary Table 3:** Overview of individual primary and secondary balancing and reinforcing loops in the CLD.
- **Supplementary Table 4:** Demographic data of study participants.
- **Supplementary Table 5:** COREQ checklist.
- **Supplementary Table 6:** Interview topic guide.
- **Supplementary Table 7:** Final codebook.
- **Supplementary Table 8:** Illustrative quotes for the three generative mechanisms.

**Supplementary Fig. 1: Primary within-mechanism and secondary cross-mechanism loops in DTx development.** The inclusion of six secondary loops (B3a/b/c, B4 and B5a/b) reflect the contingent effects within the model.

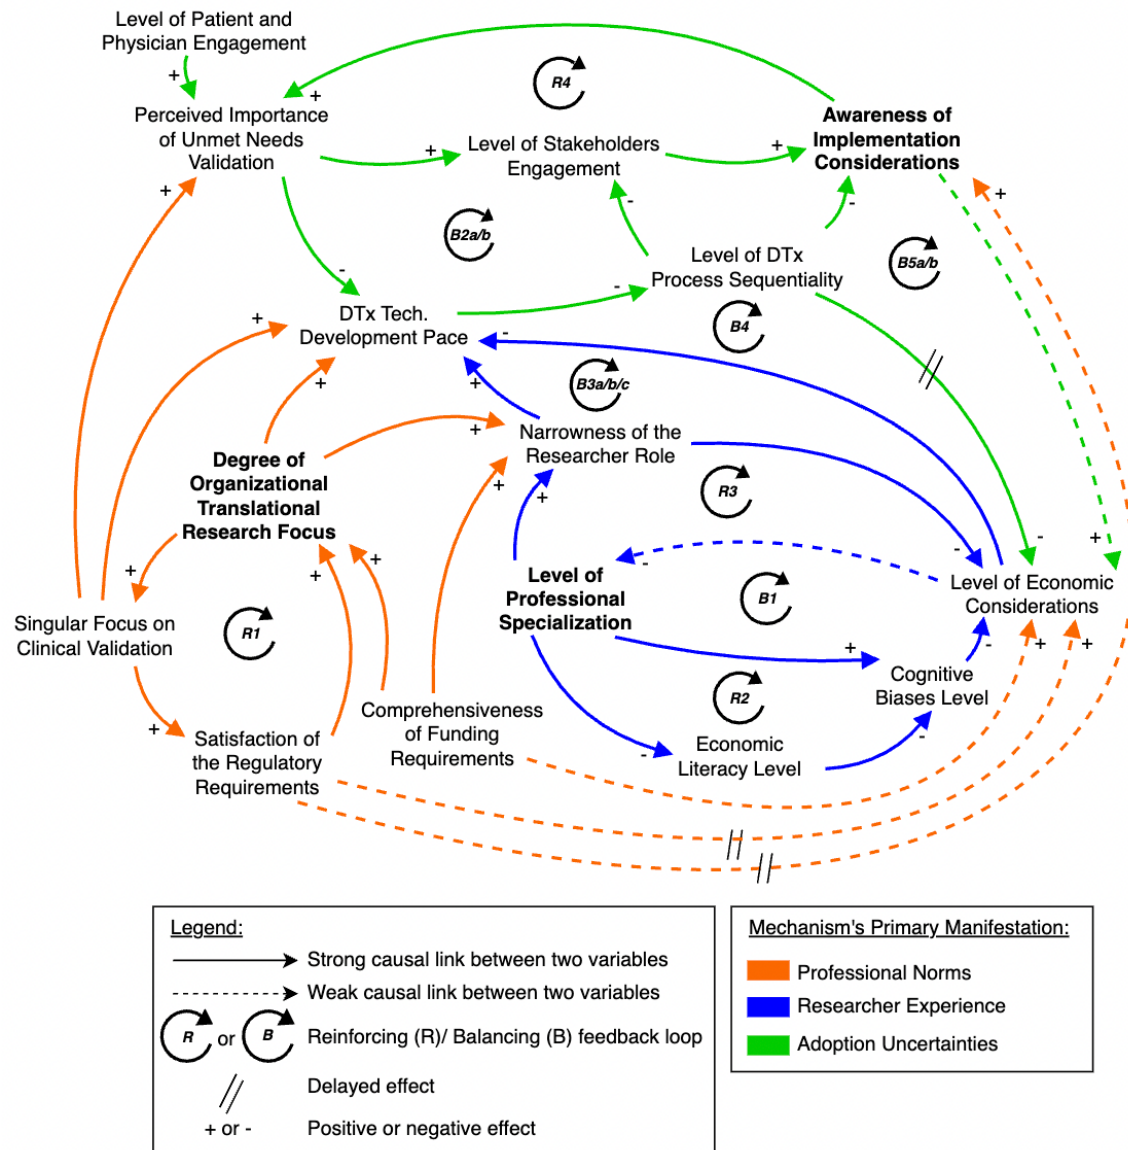

**Supplementary Fig. 2: Verbatim to codes, subthemes, and themes.** The figure illustrates the methodological progression from participant verbatim through concrete first-order codes to abstract themes, demonstrating Saldaña's "code weaving" principle of integrating empirical data into coherent theoretical constructs<sup>1</sup>.

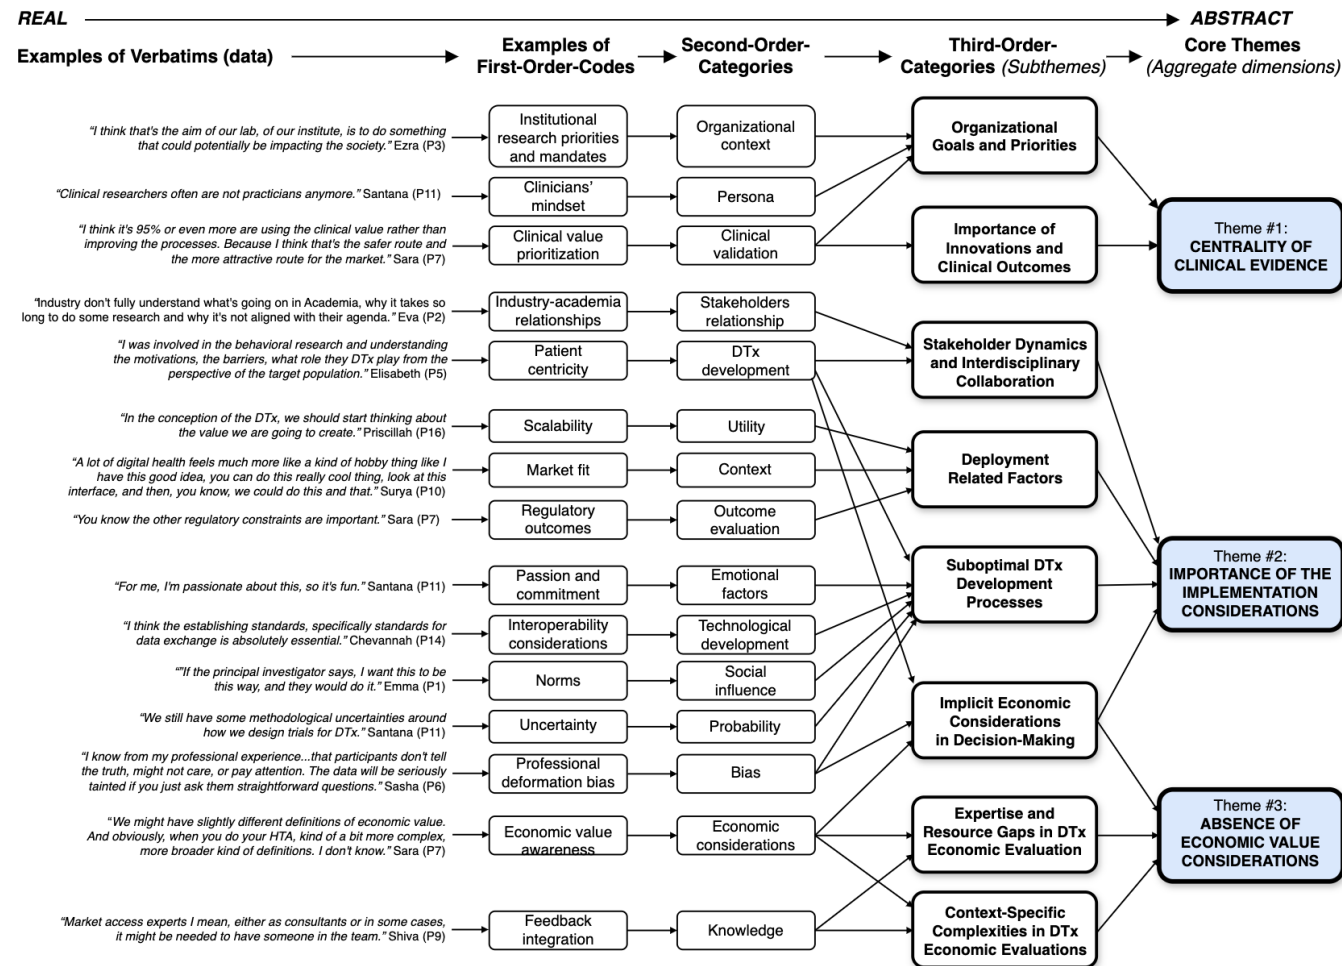

## Supplementary Note 1: Integrated theoretical framework.

This supplementary note presents a comprehensive synthesis of the literature review that underpins the proposed theoretical framework guiding this study. The integration of Decision Theory (DT) and Systems Thinking (ST) within a Critical Realism (CR) paradigm provides robust analytical tools for examining complex decision-making processes in DTx development while informing the methodological approach employed in this research.

### Critical realism

The study is grounded in CR, which provides a philosophical framework recognizing three interconnected domains of reality<sup>2</sup>:

- **Empirical:** This domain captures the perceptions, feelings and experiences of the researchers as they navigate the DTx development process. It represents only the most surface level of the observable reality.
- **Actual:** This domain refers to events or phenomena that occur, independently of the researchers' awareness or interpretation. While these events are concrete occurrences, they emerge from deeper causal powers.
- **Real:** This domain contains the causal mechanisms that generate observable events in the “actual” and shape experiences. These mechanisms operate whether they are activated or perceived, such as institutional pressures for commercialization manifested through performance metrics, underlying power dynamics between academic and commercial interests, or structural economic constraints that influence priorities. These mechanisms, while not directly observable, can be theoretically identified through their manifestation in events and experiences.

This approach enables exploration beyond surface-level patterns to identify deeper explanatory mechanisms shaping researchers' decision-making<sup>3</sup>. Recent research has also demonstrated CR particular relevance for social studies of health, illness, and medical settings<sup>4,5</sup>, as well as in information systems research<sup>6,7</sup>. Having established CR as the research study's philosophical foundation, the theoretical frameworks can now be examined more in-depth to understand how researchers navigate the complexities of DTx development.

### Decision theory in healthcare innovation

DT provides a comprehensive foundation for analyzing complex choice-making processes under uncertainty – a central challenge in healthcare innovation. DT helps us understand both the observable patterns in researchers' choices and the underlying mechanisms generating them by drawing on principles from economics<sup>8</sup>, psychology<sup>9</sup>, statistics<sup>10</sup>, and medicine<sup>11</sup>. In healthcare innovation, DT encompasses both normative and descriptive approaches<sup>12</sup>.

#### ***Expected utility theory (EUT) - The normative component***

EUT, developed by von Neumann and Morgenstern<sup>13</sup>, offers valuable insights into optimal decision-making under uncertainty—a persistent challenge in healthcare<sup>14,15</sup>. EUT posits that individuals make decisions by evaluating the probability and utility (satisfaction or value) of each possible outcome. The theory expresses rational choice mathematically as the maximization of expected utility, calculated by multiplying the utility of each outcome by its probability, providing a weighted average of utility

outcomes while accounting for inherent risks and uncertainties of DTx development. In healthcare, this manifests through structured evaluation frameworks like Health Technology Assessment (HTA), which provides a systematic approach to evaluating new technologies by weighing potential benefits against costs.

Despite its value, EUT faces several limitations in real-world healthcare settings<sup>16</sup>. The assumption of rationality conflicts with bounded rationality, as healthcare professionals often work with incomplete or ambiguous information. Precise utility quantification is challenging in healthcare's multidimensional outcomes. Multiple stakeholders with diverse interests challenge unified utility maximization. The theory also struggles to account for heuristic decision-making in healthcare practice<sup>17</sup>. These limitations suggest that while EUT provides valuable theoretical insights and a structured framework for decision analysis its practical application must be complemented by approaches that account for healthcare decision-making complexities.

### ***Behavioral decision theory (BDT) - The descriptive component***

BDT examines how researchers actually make decisions, acknowledging inherent human biases and limitations. Key concepts include bounded rationality<sup>18,19</sup>, where decision-makers select satisfactory rather than optimal solutions under cognitive constraints; cognitive biases such as optimism bias<sup>20</sup>, pro-innovation bias<sup>21</sup>, and selection bias<sup>22</sup>; and heuristics as mental shortcuts used to navigate decisions under uncertainty<sup>23,24</sup>.

BDT also has limitations in healthcare contexts. It may not fully capture institutional and systemic factors<sup>25</sup>. Regulatory frameworks often override individual behavioral tendencies. It may also underestimate the value of professional experience and domain expertise in healthcare settings<sup>26</sup>.

As Desmond et al. note, decision-making in healthcare innovation encompasses various strategies employed under different circumstances<sup>24</sup>. The integration of normative and descriptive components creates a robust theoretical foundation that captures such complexity by defining optimal decision-making approaches while accounting for human tendencies and real-world complexities in healthcare innovation. This dual perspective is particularly relevant when examining how researchers navigate economic considerations in DTx development, where decisions emerge from an intricate balance between rational analytical approaches (EUT) and the inevitable influence of behavioral and contextual factors (BDT).

The synthesis of these theoretical frameworks informs the research approach by highlighting areas for investigation (Supplementary Table 1).

**Supplementary Table 2: Relevance of decision theory in the context of the research question.**

| Theoretical Foundation           | Core principles                                                                                                                                                                                                                                 | Relevance to the Research Question                                                                                                                                                                                                                                                                                                                                                                                                                                                                  |
|----------------------------------|-------------------------------------------------------------------------------------------------------------------------------------------------------------------------------------------------------------------------------------------------|-----------------------------------------------------------------------------------------------------------------------------------------------------------------------------------------------------------------------------------------------------------------------------------------------------------------------------------------------------------------------------------------------------------------------------------------------------------------------------------------------------|
| Expected Utility Theory (EUT)    | <ul style="list-style-type: none"> <li>• Rational decision-making based on utility maximization;</li> <li>• Systematic quantification of utility (e.g., health outcomes) through HTA;</li> <li>• Evaluation of risk and uncertainty.</li> </ul> | <ul style="list-style-type: none"> <li>• Provides a framework for rational decision-making under uncertainty, offering standardized approaches for generating and evaluating evidence;</li> <li>• Guides the evaluation of technological and clinical factors using economic models (such as HTA) to maximize utility and optimize health outcomes;</li> <li>• Informs decision-makers in resource allocation during technology development and validation.</li> </ul>                              |
| Behavioral Decision Theory (BDT) | <ul style="list-style-type: none"> <li>• Cognitive biases and decision heuristics;</li> <li>• Bounded rationality;</li> <li>• Contextual dependence of decisions.</li> </ul>                                                                    | <ul style="list-style-type: none"> <li>• Cognitive biases may lead researchers to overestimate benefits or underestimate risks, skewing development decisions;</li> <li>• Affects how economic risks and clinical uncertainties are perceived, potentially influencing technology development and prioritization;</li> <li>• Highlights the importance of understanding the decision context and available information to distinguish between rational and satisfactory decision-making.</li> </ul> |

### **Systems thinking: Extending decision theory**

While DT provides valuable insights into individual decision-making processes, it does not fully capture the complex, multi-stakeholder nature of healthcare innovation. ST offers a complementary framework that situates individual decision-making within broader systemic contexts<sup>27</sup>.

ST provides, indeed, a robust framework for understanding complex, multi-level systems where technological, individual, organizational, and broader contextual factors interact dynamically, influencing researchers' decision-making processes and ultimately DTx development trajectories<sup>28</sup>. These interactions over time create emergent properties that cannot be understood by examining components in isolation, making ST particularly valuable for comprehending the complexity of researchers' decision-making processes in DTx development.

ST introduces several essential concepts: emergence, where system behaviors arise from interactions between components; non-linearity, where minor decisions can produce disproportionately large effects; feedback loops, where actions produce consequences that influence subsequent decisions; power dynamics, where asymmetries between stakeholders influence which considerations receive priority; and temporal dynamics, where development unfolds across multiple time horizons<sup>29</sup>.

ST, particularly through system dynamics (SD) modeling, allows us to identify and analyze the varying temporal scales of feedback loops in DTx development. By incorporating temporal dynamics into the analysis, how the tension between short-term economic pressures and long-term value creation is navigated by researchers can be better understood.

SD, a methodology within ST, offers structured approaches like Causal Loop Diagrams (CLDs) to map relationships and feedback loops between system elements. These tools help capture non-linear mechanisms and identify potential intervention points<sup>27,30</sup>.

### Theoretical framework synthesis

The complex, multi-stakeholder nature of DTx development requires robust theoretical grounding to understand researchers' decision-making processes. DT, through its dual components of EUT and BDT, provides a comprehensive framework for analyzing both the underlying mechanisms and contextual conditions that influence researchers' decision-making. ST offers a natural extension to DT by providing conceptual tools to understand how individual decisions both influence and are influenced by broader system structures.

As illustrated in Supplementary Fig. 3, this study's integrated theoretical framework combines DT with ST within a CR ontology to comprehend researchers' decision-making processes. This integrated approach enables us to identify not just what economic decisions are made, but how they emerge from complex interactions between individual cognitive processes, organizational structures, and environmental contexts. Such understanding is crucial for identifying potential intervention points and developing more effective strategies for economically sustainable DTx innovations that successfully navigate the complex pathway from concept to clinical implementation.

**Supplementary Fig. 3: Integrated theoretical framework for researchers' decision-making in DTx development.** This figure outlines an integrated theoretical framework for studying researchers' economic decision-making in DTx development, illustrating how the CR three layers of reality provide the philosophical foundation for combining DT and ST to understand how researchers' decisions operate within complex system relationships, ultimately informing a methodological approach.

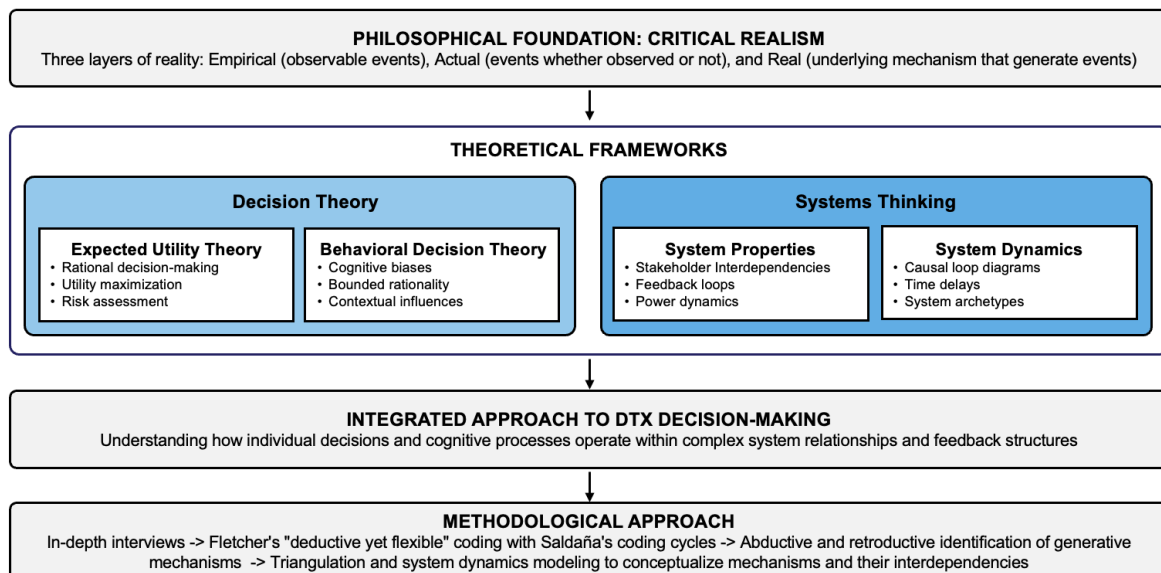

## Supplementary Note 2: Detailed results from steps 1 and 2 of data analysis.

This supplementary note summarizes the results from step 1 (Coding and identification of demi-regularities) and step 2 (Abductive reasoning process), as outlined in the data analysis methodology summary (Supplementary Table 2). These results informed the generative mechanisms retroduced in step 3, which are detailed in the Results section of the main paper.

### Emerging core themes (step 1)

First, the centrality of clinical evidence emerged as the most prominent demi-regularity, quantitatively corroborated by the highest coding frequency for the “Clinical Validation > Clinical value prioritization” code across the transcript corpus. Despite EUT's prediction that researchers would systematically evaluate all value components, participants consistently steered discussions toward clinical considerations. The predominance of clinical considerations became particularly evident through researchers' implicit interpretations of key terminology. When participants employed terms, such as “validation” and “generating evidence,” these consistently referenced clinical trials and clinical evidence generation rather than other forms of validation (technical or economic).

This clinically driven perspective extended to researchers' conceptualization of “value” of a DTx, which they predominantly viewed through the lens of clinical needs and safety/efficacy evidence. This pattern, which emerged consistently across clinician-researchers, was exhibited by most health systems and social science researchers and was frequently observed by practitioner-researchers. Notably, interviews with research engineers revealed a more nuanced pattern. Within this group, technological “performance” of the DTx, and what one participant termed “shiny engineering innovations” emerged as equally significant factors in their decision-making frameworks. This variation suggests a potential disciplinary influence on value assessment approaches within DTx research and development.

Second, implementation factors played a crucial role in development decisions, revealing tensions between rational planning and behavioral responses to uncertainty. Participants emphasized factors like “manpower utilization”, “workflow integration,” “care pathway changes”, clinical team “productivity” impacts, and “acceptability” from both patients and care teams. As Cheah (P13) articulated, *“when you implement a [DTx] solution in a clinical setup, most likely it's not going to work out. Implementation is an issue, such as adherence and adoption of a technology”*. Emma (P1) elaborated on this perspective: *“There's obviously the medical value of the DTx, but it's also the workflow fit, and the human factors more broadly considered. What is the patient journey, where the solution is going to fit, understand the physician's decision making, their involvement, are the nurses involved?”* Uncertainties surrounding implementation and adoption may foster risk-averse decision-making, potentially limiting innovation in traditionally conservative healthcare settings. Elisabeth (P5) emphasized the importance of balancing internal constraints to avoid *“overburdening some of the early thinking point”* and maintaining an innovative culture. This risk-aware approach could also drive more rigorous pre-implementation planning during early DTx development, including new frameworks for risk assessment and controlled experiments. The study findings revealed that researchers typically employ multiple validation approaches to address implementation uncertainties, including physician and patient consultations to comprehensively evaluate needs and perspectives as well as pilot studies and usability testing.



Third, the absence of economic value considerations in early development stages emerged as a consistent pattern, reflecting the BDT's concept of bounded rationality. With a single exception (Cheah, P13), both clinician-researchers and research-engineers consistently indicated that economic factors fell outside their priorities or perceived responsibilities. Researchers also expressed uncertainty about incorporating economic considerations into their DTx development processes. Cheah (P13) stood as the sole exception, noting: *"In our ongoing study, the cost-effectiveness of our model of care is the primary endpoint, and the secondary endpoints are actually the efficacy and safety to supplement prior evidence we have on those aspects."* This systematic de-prioritization of economic considerations in the sample deviates from the EUT's prediction of comprehensive utility maximization, creating potential blind spots in decision-making.

These demi-regularities suggest a complex interplay between rational decision-making frameworks and behavioral influences, with interesting tensions between EUT predictions and BDT observations, shaping how researchers approach DTx development decisions.

### **Puzzling facts and plausible explanations (step 2)**

The second step, following Sætre and Van de Ven four-step abductive reasoning approach<sup>31</sup>, identified puzzling facts and provided plausible explanations for them. As discussed above, a key empirical finding was researchers' predominant focus on clinical evidence, either as a single priority or combined with technological performance considerations in DTx development. Surprisingly, researchers focused almost exclusively on clinical benefits, leaving little room for other forms of value evidence, particularly economic considerations or process-oriented categories (e.g., DTx that enhance self-management capabilities, support informed decision-making, or reduce healthcare access barriers). This finding contrasts with researchers' acknowledged importance of such factors for successful implementation<sup>32</sup>, as well as with healthcare systems' evolution since 2006—from the "triple aim" of improving care, health, and cost to the "Quadruple Aim" framework that adds meaning at work<sup>33</sup>. Modern healthcare frameworks recognize that, given limited resources, the economic aspects of healthcare delivery cannot be separated from clinical considerations. Germany's Digital Health Applications (DiGA) framework exemplifies this integrated approach, legitimizing *"patient-relevant improvements in structure and process"* alongside direct medical benefits when evaluating DTx for market approval<sup>34</sup>.

The dominance of clinical evidence permits multiple theoretical interpretations. At its core, it likely reflects a deeply embedded institutional logic within healthcare, where clinical outcomes have historically served as the foundation of medical decision-making. Organizational structures and research priorities—whether oriented toward pure or translational research—may also influence researchers' decision-making patterns.

Participants viewed economic considerations as outside their domain of expertise, expressing uncertainty regarding economic evaluations and their inherent complexity for DTx. This represents a form of constrained utility maximization where researchers optimize within familiar domains rather than across all value dimensions (clinical, technical, and economic). This selective optimization contrasts with EUT's prediction of comprehensive value assessment and maximization but aligns with BDT's concept of bounded rationality. While researchers wanted "their" DTx to be of use, their tendency toward "familiarity" was observed—defaulting to clinical metrics rather than pursuing

comprehensive value assessments—and “satisficing behavior,” choosing the first option that meets minimum acceptability levels. As articulated by Camirah (P15): *“We tried doing some form of costing analysis, but we are not sure whether we are holistic enough in presenting the project costings to higher management. So that’s something we are still struggling with. We may be throwing money into the ocean...”*

The systematic deprioritization, or absence, of economic considerations throughout DTx development, may be attributed to a lack of awareness of their importance at individual and/or institutional levels, especially in later stages of the DTx process, for implementation, adoption and for potential reimbursement decision. It can also be hypothesized that researchers were led back to more familiar domains by a certain level of economic literacy limitations in the interview sample. Moreover, most researchers conceptualized the DTx process as linear and chronological or sequential, with a stepwise approach. This sequential decision-making framework may explain the deferral of economic considerations to later stages, further supporting the use of heuristic decision-making strategies outlined in the BDT framework.

Researchers consistently reported uncertainty surrounding DTx implementation and adoption as a potential “barrier” or “complexity,” which led to the second major theme discussed above. Their acknowledgment of these aspects as significant threats to DTx success was surprising (to the research study team). Although researchers reported that economic elements did not enter their decision-making process, many of the implementation-related aspects they did consider correspond to direct and indirect medical and non-medical costs associated with DTx in HTA terminology. Indeed, the pattern of implementation prioritization aligns with important domains in HTA frameworks<sup>35–37</sup>. Although researchers reported limited consideration of economic factors throughout DTx development, the findings suggest, therefore, that certain aspects of DTx economic value may be more thoroughly integrated throughout DTx development than either articulated by the researchers or previously evidenced<sup>32</sup>.

In conclusion, the abductive analysis revealed key puzzling facts in DTx researchers' decision-making processes, suggesting a complex interplay between institutional logics, individual expertise boundaries, and conceptual frameworks. This abductive step provided plausible explanations for these phenomena, which are further examined in the retroductive step (step 3) of the analysis (see Results section) to develop a deeper understanding of the underlying mechanisms and structures influencing DTx researchers' decision-making patterns.

### **Supplementary Note 3: Saldaña's cycles of coding methodology.**

The first coding cycle employed descriptive and in vivo coding methods to identify first-order codes that preserved participants' original language and captured basic descriptive elements of the data. This process led to the development of new codes, while some existing codes were combined or refined to better reflect participants' experiences. For example, "Knowledge > Patient Feedback Integration" was broadened to "Knowledge > Feedback Integration" to reflect participants' frequent reports of consulting physicians, nurses, and specialists. The notion of DTx adoption emerged early as a potentially important factor throughout the DTx process, leading to the creation of the "Implementation > Adoption" code. Through this iterative coding process, the framework expanded from 58 provisional codes to 78 distinct codes (Supplementary Table 7), demonstrating the iterative nature of the coding process<sup>38</sup>. Throughout this process, detailed notes for each interview transcript were maintained, documenting key discussion points, interpretations, potential participant quotes and changes to the codebook.

These first-order codes were then aggregated during the second coding cycle using pattern coding and focused coding techniques to develop more conceptual second-order categories that represented broader analytical groupings. For example, several first-order codes, such as "Economic value awareness," "Business model," and "Clinical validation costs" were synthesized into the second-order category, "Economic considerations."

This progression from participant verbatim, through concrete first-order codes, to abstract themes followed Saldaña's principle of "code weaving", where codes were integrated into a coherent analytical narrative that connected empirical observations with theoretical constructs<sup>1</sup> (Supplementary Note 3 and Supplementary Fig. 2).

## Supplementary Note 4: Triangulation approach to validating mechanisms and mapping cause-effect relationships in DTx decision-making.

To conceptualize these mechanisms and elucidate their interdependencies through a CLD, an iterative three-step process was implemented to: (1) identify influencing variables, (2) map relationships and assign polarity, and (3) validate and refine the model. Throughout each phase, three distinct categories of unit triangulation were incorporated<sup>39</sup>, as shown in Supplementary Fig. 4 and detailed below.

**Supplementary Fig. 4: Implementation of triangulation methodology for CLD construction in DTx decision-making.** This figure illustrates the approach combining multiple sources of data, iterative, and investigator triangulation to systematically validate the generative mechanisms and their relationships throughout the three-phase CLD construction process.

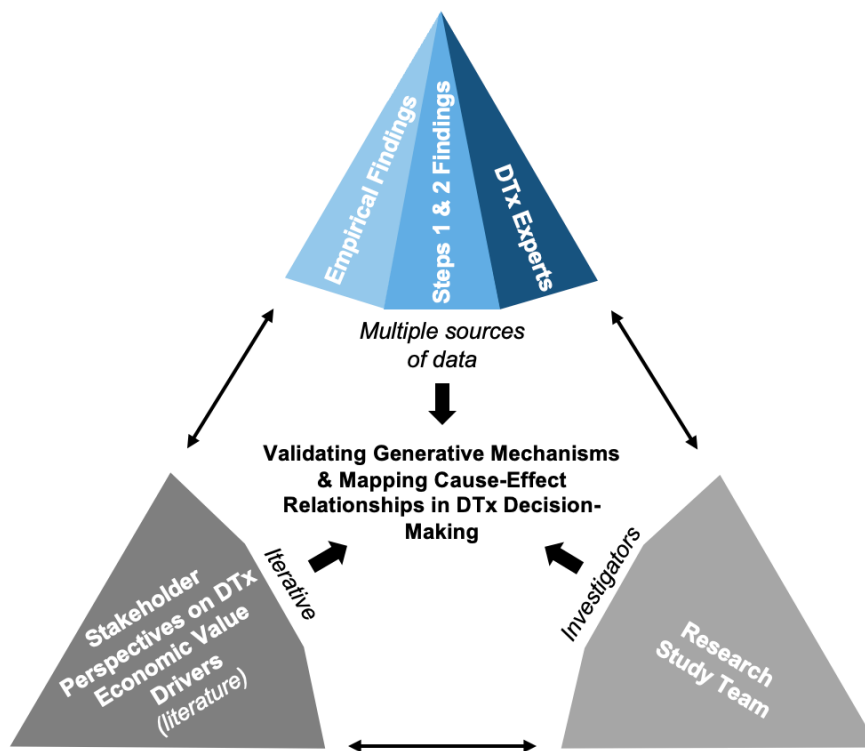

### Step 1: Variable identification

The data triangulation involved comparing **multiple sources of data**, including the study's empirical findings from both steps 1 and 2, to identify potential variables and their relationships influencing researchers' decision-making processes. The extraction of variables and their relationships from the research data incorporated both explicit participant statements about causal relationships and pattern analysis across interviews to ensure comprehensive relationship mapping. Each potential relationship was systematically evaluated against three evidence criteria: (1) explicit mention in participant interviews, (2) support in existing literature, and (3) logical consistency with decision-making theory. Relationships meeting at least two criteria were included in the model.

## Step 2: Relationship mapping and polarity assignment

In parallel with variable identification, **iterative triangulation** was employed through systematic comparisons with literature findings, including the authors' previous work, which had established both variables and causal relationships among eight clusters of factors influencing DTx economic value<sup>32</sup>. This methodological approach enabled critical comparative analysis between existing literature and refined conceptualization of variables influencing researchers' decision-making processes, and their interdependencies, leading to a CLD for each of the three generative mechanisms (Figs. 1 to 3).

Relationship polarities (positive or negative) were established by analyzing directional influence between variables, supported by literature citations and participant quotes. Positive relationships indicate that variables move in the same direction—both increasing or both decreasing together. Negative relationships indicate opposite movements. Relationship strength (strong or weak) was determined by analyzing the frequency and emphasis of these connections within the data.

Feedback loops were identified through manual loop tracing—specifically by tracing paths through the causal network diagram and identifying where variables connect back to themselves through a series of relationships. Common system archetypes that appear frequently across different domains were also sought, such as “limits to growth” or “fixes that fail,” with consideration given to the characteristics of their feedback structures<sup>40–42</sup>. Each loop was categorized as either reinforcing (R) or balancing (B) based on the product of polarities along the loop. Reinforcing loops amplify change in a consistent direction, creating exponential growth or decline patterns, while balancing loops counteract change and tend toward stability or equilibrium. Each loop was named according to its primary function within the system, with documentation of its constituent variables and potential impact on system behavior.

## Step 3: Model validation and refinement

To validate and refine the model, as new versions of the CLDs emerged, they were discussed with the research study team through **investigator triangulation** to analyze and interpret findings, including reviewing codes when needed to ensure convergence. As part of the iterative process, discussions with three DTx experts who met the study inclusion criteria but were outside the original sample were scheduled at different time intervals to interpret, validate, and refine emerging versions of the individual mechanisms CLD (Figs. 1 to 3), which over time converged into a single integrated refined CLD (Fig. 3), illustrating the generative mechanisms and their manifestations shaping economic considerations in DTx development.

**Supplementary Table 2: Data analysis methodology summary.**

| Step                                                     | Description                                                                                                                                                                                                                                                                                                                                                                                                                                                                                                                                                     | Results                                                                                                                                                                                                                                                                                                                                                                                                                                                                                                                          |
|----------------------------------------------------------|-----------------------------------------------------------------------------------------------------------------------------------------------------------------------------------------------------------------------------------------------------------------------------------------------------------------------------------------------------------------------------------------------------------------------------------------------------------------------------------------------------------------------------------------------------------------|----------------------------------------------------------------------------------------------------------------------------------------------------------------------------------------------------------------------------------------------------------------------------------------------------------------------------------------------------------------------------------------------------------------------------------------------------------------------------------------------------------------------------------|
| <b>1. Coding and identification of demi-regularities</b> | <ul style="list-style-type: none"> <li>• Creation of a “deductive yet flexible” coding framework combining DT concepts with DTx literature, while effectively capturing CR's stratified ontology<sup>38</sup>.</li> <li>• Application of both deductive and inductive coding using ATLAS.ti software.</li> <li>• Implementation of Saldaña's cycles of coding methodology for systematic data analysis<sup>1</sup>.</li> <li>• Adoption of Fletcher's approach to identify recurring patterns (demi-regularities) at the CR real level<sup>38</sup>.</li> </ul> | <ul style="list-style-type: none"> <li>• Expansion of the initial codebook from 58 to 78 distinct codes, as detailed in Supplementary Table 7.</li> <li>• Identification of three core themes as illustrated in Supplementary Fig. 2. and Supplementary Table 8: (1) centrality of clinical evidence, (2) importance of implementation considerations, and (3) absence of economic value consideration.</li> </ul>                                                                                                               |
| <b>2. Abduction</b>                                      | <ul style="list-style-type: none"> <li>• Implementation of Sætre and Van de Ven four-step abductive reasoning approach<sup>31</sup>: (1) observing puzzling facts in researchers' decision-making patterns, (2) confirming these anomalies with empirical evidence, (3) formulating explanatory hypotheses, and (4) evaluating alternative explanations.</li> </ul>                                                                                                                                                                                             | <ul style="list-style-type: none"> <li>• Iterative analysis of empirical data and theoretical literature revealed two puzzling patterns in researchers' decision-making: (1) strong prioritization of clinical evidence while consistently deprioritizing economic considerations (despite acknowledging their importance), and (2) significant focus on implementation factors that actually align with economic value domains in HTA frameworks, despite researchers' claims of neglecting economic considerations.</li> </ul> |
| <b>3. Retroduction</b>                                   | <ul style="list-style-type: none"> <li>• Investigation of causal mechanisms using Danermark's framework<sup>8</sup>.</li> <li>• Analysis of dependencies and interactions between the identified mechanisms, validated via three complementary triangulation methods (data, iterative, and investigators).</li> <li>• Visualization of complex relationships through SD and CLDs.</li> </ul>                                                                                                                                                                    | <ul style="list-style-type: none"> <li>• Recognition of three primary generative mechanisms: (1) the <i>Professional Norms</i>, (2) the <i>Researcher Experience</i>, and (3) the <i>Adoption Uncertainties</i>.</li> <li>• Developed CLDs for each mechanism (Figs 1 to 3), mapping the variables and potential causal links, which ultimately converged into an integrated single model (Fig. 3) explaining the interactions between identified mechanisms and their influence on DTx decision-making.</li> </ul>              |

**Supplementary Table 3: Overview of individual primary and secondary balancing and reinforcing loops in the CLD.**

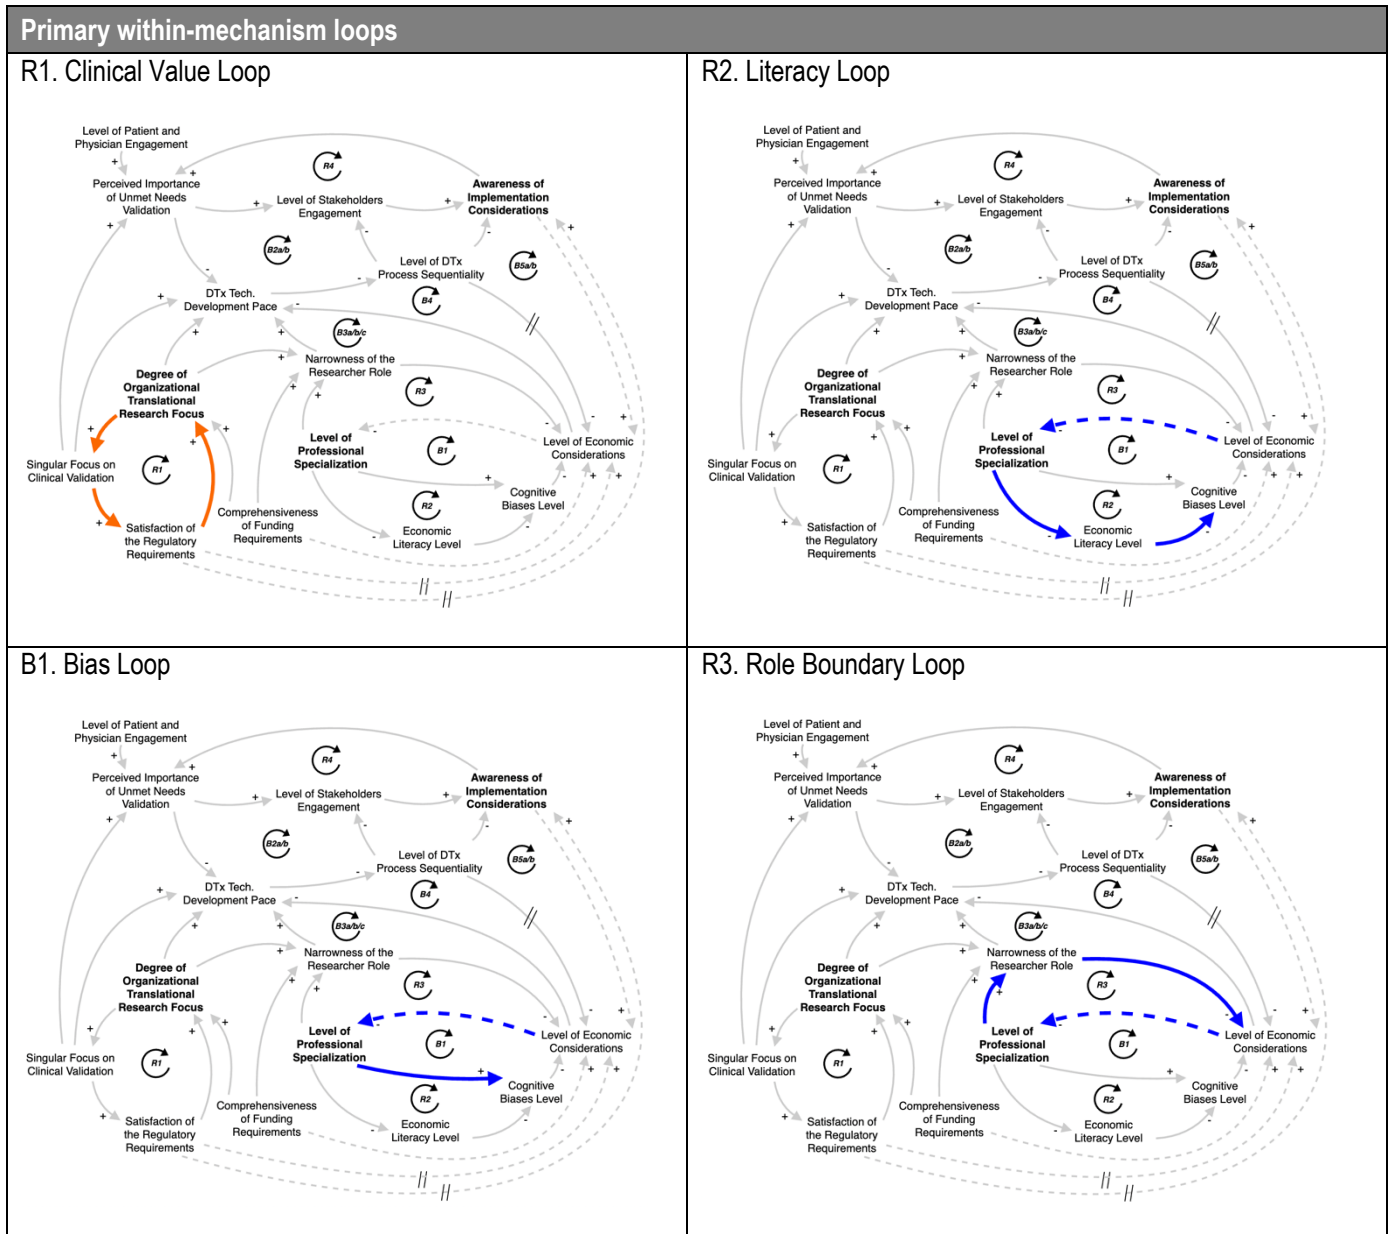

## B2a. Implementation-Driven Development Loop

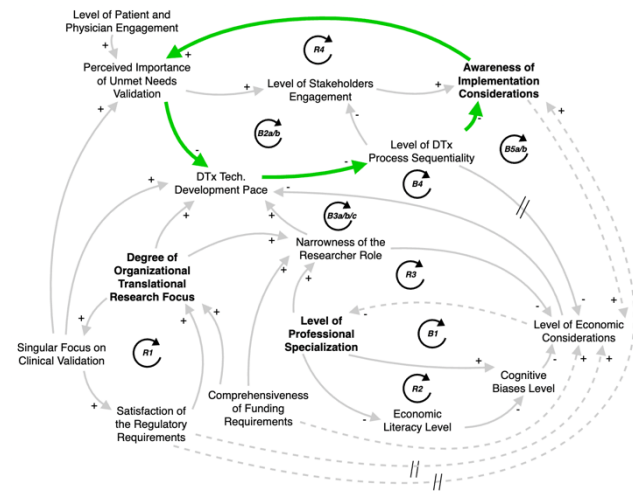

## B2b. Stakeholder-Driven Development Loop

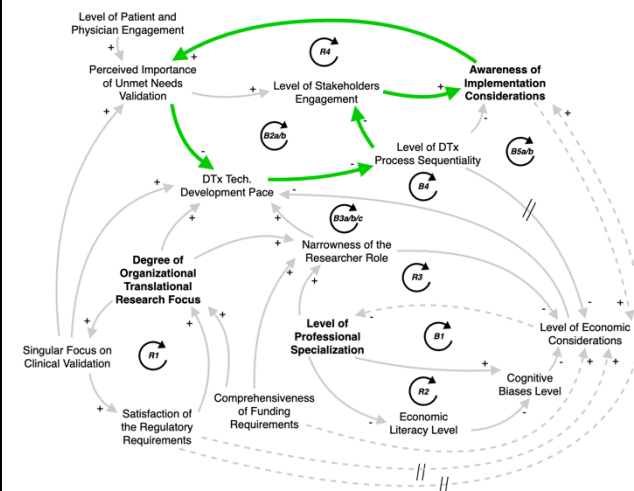

## R4. Collaboration Loop

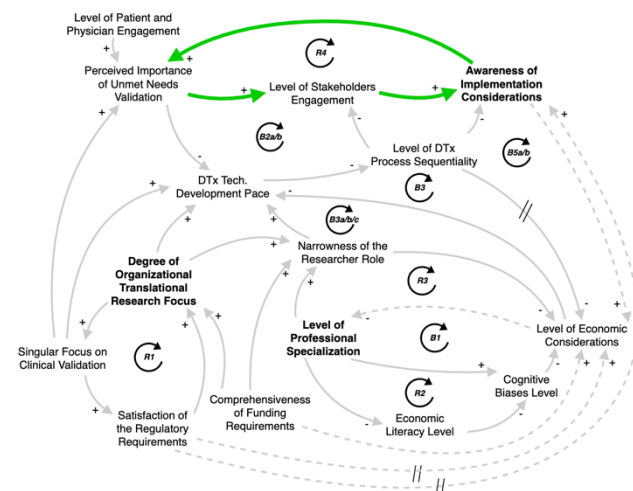



### B3a. Specialization-Technology Loop

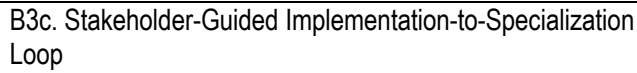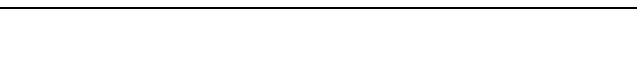

#### B4. Development Efficiency Loop

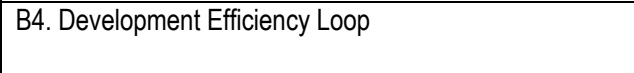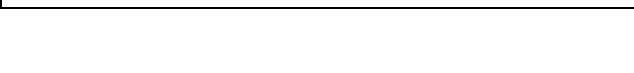

B5a. Implementation-Economic Development Loop

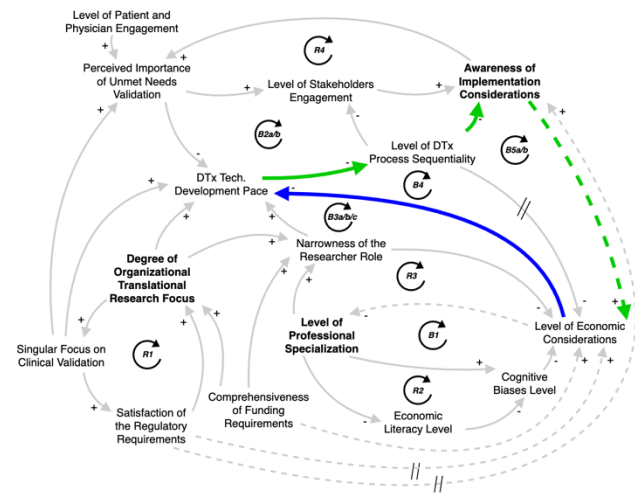

B5b. Stakeholder-Informed Implementation-Economic Loop

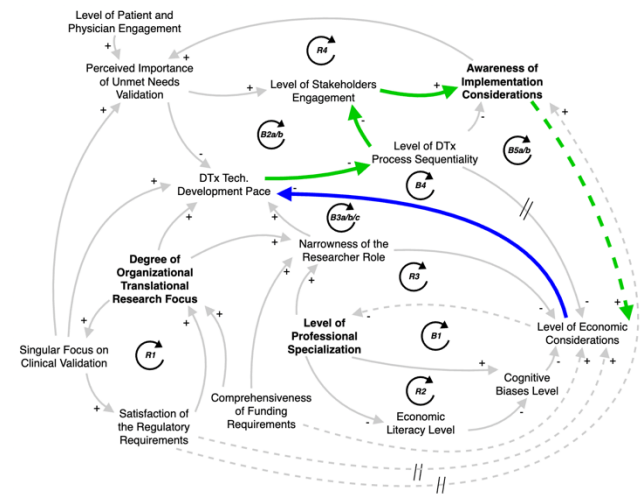

**Supplementary Table 4: Demographic data of study participants.**

| Pseudonym <sup>a</sup><br>(participant<br>number) | Field of practice            | Experience<br>across the DTx<br>lifecycle <sup>b</sup> |   |   | Years of<br>experience | Setting<br>(country)                             | Gender | Education |
|---------------------------------------------------|------------------------------|--------------------------------------------------------|---|---|------------------------|--------------------------------------------------|--------|-----------|
|                                                   |                              | 1                                                      | 2 | 3 |                        |                                                  |        |           |
| RESEARCH-ENGINEERS                                |                              |                                                        |   |   |                        |                                                  |        |           |
| Emma<br>(P1)                                      | Biomedical<br>engineering    | x                                                      | x | x | > 10                   | Public academic institution<br>(Singapore)       | F      | Ph.D.     |
| Eva<br>(P2)                                       | Biomedical<br>engineering    | x                                                      | x | x | > 10                   | Public academic institution<br>(USA)             | F      | Ph.D.     |
| Ezra<br>(P3)                                      | Biomedical<br>engineering    | x                                                      | x |   | > 5                    | Public academic institution<br>(Singapore)       | M      | Ph.D.     |
| Eisa<br>(P4)                                      | Biomedical<br>engineering    | x                                                      | x |   | > 5                    | Public academic institution<br>(Singapore)       | M      | Ph.D.     |
| Elisabeth<br>(P5)                                 | Neuroengineering             | x                                                      | x | x | > 10                   | Private healthcare organization<br>(Switzerland) | F      | Ph.D.     |
| HEALTH SYSTEMS AND SOCIAL SCIENCE RESEARCHERS     |                              |                                                        |   |   |                        |                                                  |        |           |
| Sasha<br>(P6)                                     | Behavioral<br>sciences       |                                                        |   | x | > 10                   | Public academic institution<br>(Singapore)       | M      | Ph.D.     |
| Sara<br>(P7)                                      | Healthcare<br>management     |                                                        |   | x | > 10                   | Public academic institution<br>(Germany)         | F      | Ph.D.     |
| Senna<br>(P8)                                     | Health policy                |                                                        | x | x | > 5                    | Public academic institution<br>(United Kingdom)  | M      | Ph.D.     |
| Shiva<br>(P9)                                     | Health policy                | x                                                      | x |   | > 5                    | Public academic institution<br>(Singapore)       | M      | Ph.D.     |
| Surya<br>(P10)                                    | Health economics             | x                                                      | x | x | > 20                   | Public academic institution<br>(United Kingdom)  | M      | Ph.D.     |
| Santana<br>(P11)                                  | Health economics             |                                                        | x | x | > 10                   | Public academic institution<br>(Germany)         | M      | Ph.D.     |
| CLINICIAN-RESEARCHERS                             |                              |                                                        |   |   |                        |                                                  |        |           |
| Christoph<br>(P12)                                | Neuropsychology              |                                                        | x | x | > 20                   | Private healthcare provider<br>(Australia)       | M      | Ph.D.     |
| Cheah<br>(P13)                                    | Ophthalmology                | x                                                      | x |   | > 10                   | Public healthcare provider<br>(Singapore)        | M      | Ph.D.     |
| Chevannah<br>(P14)                                | Cardiology                   | x                                                      |   | x | > 10                   | Private healthcare organization<br>(Germany)     | F      | Ph.D.     |
| Camirah<br>(P15)                                  | Nursing                      | x                                                      | x |   | > 5                    | Public healthcare provider<br>(Singapore)        | F      | Ph.D.     |
| PRACTITIONER-RESEARCHERS                          |                              |                                                        |   |   |                        |                                                  |        |           |
| Priscillah<br>(P16)                               | Technology<br>implementation | x                                                      | x | x | > 20                   | Public healthcare provider<br>(Canada)           | F      | M.Sc.     |
| Priyah<br>(P17)                                   | Technology<br>implementation | x                                                      | x | x | > 15                   | Public healthcare provider<br>(Singapore)        | F      | Ph.D.     |

<sup>a</sup> The pseudonyms are designed to convey key information about each participant. The first letter indicates their role: 'E' for research-engineers, 'S' for health systems and social science researchers, 'C' for clinician-researchers, and 'P' for practitioner-researchers. The last letter denotes their current work setting: 'A' for academic organization, and 'H' for healthcare providers or organizations (either private or public). The gender of the pseudonym corresponds to the participant's sex. For instance, the pseudonym "Christoph" (P12) signifies a male clinician-researcher working in a healthcare organization or provider.

<sup>b</sup> Phase 1 encompasses the technological development of the DTx intervention, followed by phase 2, the clinical validation of the DTx intervention through clinical trials, and finally phase 3 corresponds to the implementation of the DTx intervention in a real-world environment.

**Supplementary Table 5: COREQ checklist.**

| Item No                                        | Guide Questions/Description                                           | Comment                                                                                                                                                                                                                                                                                                                                                                                                                                                                                                                                                                                                                                                                                                                                                                |
|------------------------------------------------|-----------------------------------------------------------------------|------------------------------------------------------------------------------------------------------------------------------------------------------------------------------------------------------------------------------------------------------------------------------------------------------------------------------------------------------------------------------------------------------------------------------------------------------------------------------------------------------------------------------------------------------------------------------------------------------------------------------------------------------------------------------------------------------------------------------------------------------------------------|
| <b>Domain 1: Research team and reflexivity</b> |                                                                       |                                                                                                                                                                                                                                                                                                                                                                                                                                                                                                                                                                                                                                                                                                                                                                        |
| <b>Personal Characteristics</b>                |                                                                       |                                                                                                                                                                                                                                                                                                                                                                                                                                                                                                                                                                                                                                                                                                                                                                        |
| 1. Interviewer/facilitator                     | Which author/s conducted the interviews?                              | YS conducted the semi-structured interviews.                                                                                                                                                                                                                                                                                                                                                                                                                                                                                                                                                                                                                                                                                                                           |
| 2. Credentials                                 | What were the researcher's credentials?                               | YS holds an M.Sc. in Entrepreneurship and Strategic Management and is a doctoral student researching economic value drivers for DTx. LMC has a Ph.D. in Strategic Management and Applied Economics and conducts research in Information Technology management. AM holds a Ph.D. in Management Science, specializing in decision analysis and operations research, with expertise in healthcare decision-making and health economics. DH holds a Ph.D. in Biomedical Engineering, SL in Communication and Information, and GS a Ph.D. in Economics.                                                                                                                                                                                                                     |
| 3. Occupation                                  | What was their occupation at the time of the study?                   | YS served as a Director at the Institute of Digital Medicine (WisDM), National University of Singapore, while LMC was a Professor in the Department of Analytics, Operations, and Information Technologies, School of Management Sciences, at the University of Quebec at Montreal, Canada. DH was the Provost's Chair Professor, Director of the Institute for Digital Medicine (WisDM), Director of the N.1 Institute for Health, and Head of the Department of Biomedical Engineering at the National University of Singapore. AM holds joint appointments at the National University of Singapore, Duke-NUS and the University of Strathclyde. SL and GS are both research fellows at the Institute of Digital Medicine (WisDM), National University of Singapore. |
| 4. Gender                                      | Was the researcher male or female?                                    | One woman-identifying researcher and five male-identifying researchers.                                                                                                                                                                                                                                                                                                                                                                                                                                                                                                                                                                                                                                                                                                |
| 5. Experience and training                     | What experience or training did the researchers have?                 | YS, LMC, AM, SL, GS, and DH have extensive experience in conducting qualitative health research. Additionally, YS, LMC, and DH have recently published relevant papers to the research question. LMC teaches research methods in the areas of information technology. AM focuses on developing methodologies for supporting complex healthcare resource allocation and policy decisions, having made significant contributions to health technology assessment and healthcare prioritization. SL and GS specialize in decision-making and behavior changes in health and public policy.                                                                                                                                                                                |
| <b>Relationship with participants</b>          |                                                                       |                                                                                                                                                                                                                                                                                                                                                                                                                                                                                                                                                                                                                                                                                                                                                                        |
| 6. Relationship established                    | Was a relationship established prior to study commencement?           | YS and DH had varying relationships with the health community at large, while LMC, AM, SL, and GS had no relationships with participants prior to the study. All were perceived as unbiased researchers rather than persons with a particular stake, stance or opinion about the topic.                                                                                                                                                                                                                                                                                                                                                                                                                                                                                |
| 7. Participant knowledge of the interviewer    | What did the participants know about the researcher?                  | The interviewers introduced themselves to participants and describing the context, scope and purpose of the research, going through the different sections of the consent form. The contents followed the exact guidelines as certified by ethics review boards for research with human beings of all institutions involved.                                                                                                                                                                                                                                                                                                                                                                                                                                           |
| 8. Interviewer characteristics                 | What characteristics were reported about the interviewer/facilitator? | The participants were informed of the knowledge gap and corresponding research question as context for the interview, highlighting the interviewers' interest in addressing this gap without presenting specific assumptions or potential biases. The contents followed the exact guidelines as certified by ethics review boards for research with human beings of all institutions involved.                                                                                                                                                                                                                                                                                                                                                                         |
| <b>Domain 2: study design</b>                  |                                                                       |                                                                                                                                                                                                                                                                                                                                                                                                                                                                                                                                                                                                                                                                                                                                                                        |
| <b>Theoretical framework</b>                   |                                                                       |                                                                                                                                                                                                                                                                                                                                                                                                                                                                                                                                                                                                                                                                                                                                                                        |

| Item No                                  | Guide Questions/Description                                                       | Comment                                                                                                                                                                                                                                                                                                                                                                                                                                                                          |
|------------------------------------------|-----------------------------------------------------------------------------------|----------------------------------------------------------------------------------------------------------------------------------------------------------------------------------------------------------------------------------------------------------------------------------------------------------------------------------------------------------------------------------------------------------------------------------------------------------------------------------|
| 9. Methodological orientation and Theory | What methodological orientation was stated to underpin the study?                 | Critical realism was established as the study's philosophical foundation. Theoretical frameworks such as DT and ST were introduced to examine and interpret how researchers navigate the complex choices involved in DTx development.                                                                                                                                                                                                                                            |
| <b>Participant selection</b>             |                                                                                   |                                                                                                                                                                                                                                                                                                                                                                                                                                                                                  |
| 10. Sampling                             | How were participants selected?                                                   | Purposive sampling was used. Initial recruitment occurred through the research team's professional network, with participants encouraged to refer qualified colleagues through snowball sampling.                                                                                                                                                                                                                                                                                |
| 11. Method of approach                   | How were participants approached?                                                 | Email invitations were sent to individuals who could potentially meet the following inclusion criteria: (1) a minimum of five years of experience in DTx development or clinical validation, (2) current involvement in the technological development or clinical validation of a DTx, (3) fluency in English or French. The recruitment process followed the exact guidelines as certified by ethics review boards for research with human beings of all institutions involved. |
| 12. Sample size                          | How many participants were in the study?                                          | 17 Participants. For details of the study participants' demographic data, please refer to Supplementary Table 4.                                                                                                                                                                                                                                                                                                                                                                 |
| 13. Non-participation Setting            | How many people refused to participate or dropped out? Reasons?                   | While several individuals did not respond to the invitation, nobody explicitly declined the invitation. All those who agreed to participate remained committed throughout the study. This followed the exact guidelines as certified by ethics review boards for research with human beings of all institutions involved regarding participants' informed consent and right to withdraw without justification.                                                                   |
| 14. Setting of data collection           | Where was the data collected?                                                     | Data were collected through either Zoom or face-to-face interviews and analyzed using ATLAS.ti software (ATLAS.ti Scientific Software Development GmbH).                                                                                                                                                                                                                                                                                                                         |
| 15. Presence of nonparticipants          | Was anyone else present besides the participants and researchers?                 | None.                                                                                                                                                                                                                                                                                                                                                                                                                                                                            |
| 16. Description of sample                | What are the important characteristics of the sample?                             | Fully presented in Supplementary Table 4.                                                                                                                                                                                                                                                                                                                                                                                                                                        |
| <b>Data collection</b>                   |                                                                                   |                                                                                                                                                                                                                                                                                                                                                                                                                                                                                  |
| 17. Interview guide                      | Were questions, prompts, and guides provided by the authors? Was it pilot tested? | A semi-structured interview guide with key questions was designed to explore topics including: (1) participants' roles as DTx researchers, (2) their priorities and key considerations throughout the DTx lifecycle, and (3) day-to-day prioritization and decision-making processes. Please refer to Table 3 for details of the topics discussed.                                                                                                                               |
| 18. Repeat interviews                    | Were repeat interviews carried out? If yes, how many?                             | No.                                                                                                                                                                                                                                                                                                                                                                                                                                                                              |
| 19. Audio/visual recording               | Did the research use audio or visual recording to collect the data?               | All interviews were audio-recorded and later transcribed. This followed the exact guidelines as certified by ethics review boards for research with human beings of all institutions involved in data management procedures during the research, during the analysis, and post-reporting.                                                                                                                                                                                        |
| 20. Field notes                          | Were field notes made during and/or after the interview or focus group?           | Following each interview, the interviewer documented brief notes highlighting the interview's nature and key themes emphasized by the interviewee.                                                                                                                                                                                                                                                                                                                               |
| 21. Duration                             | What was the duration of the interviews or focus group?                           | Interview duration varied but typically ranged from 45 to 60 minutes.                                                                                                                                                                                                                                                                                                                                                                                                            |
| 22. Data saturation                      | Was data saturation discussed?                                                    | Yes.                                                                                                                                                                                                                                                                                                                                                                                                                                                                             |

| Item No                                | Guide Questions/Description                                                                             | Comment                                                                                                                                                                                                                                                                                                      |
|----------------------------------------|---------------------------------------------------------------------------------------------------------|--------------------------------------------------------------------------------------------------------------------------------------------------------------------------------------------------------------------------------------------------------------------------------------------------------------|
| 23. Transcripts returned               | Were transcripts returned to participants for comment and/or correction?                                | No.                                                                                                                                                                                                                                                                                                          |
| <b>Domain 3: analysis and findings</b> |                                                                                                         |                                                                                                                                                                                                                                                                                                              |
| <b>Data analysis</b>                   |                                                                                                         |                                                                                                                                                                                                                                                                                                              |
| 24. Number of data coders              | How many data coders coded the data?                                                                    | The interviewer coded and described the data, regularly discussing the resulting codes with the research study team. The analysis combined deductive and inductive coding, followed by abductive and retroductive processes, to identify generative mechanisms underlying observed decision-making patterns. |
| 25. Description of the coding tree     | Did the authors provide a description of the coding tree?                                               | Yes. Please refer to Supplementary Fig. 2 for the verbatim to codes, subthemes, and themes developed through Fletcher's "deductive yet flexible" coding <sup>38</sup> with Saldaña's coding cycles <sup>1</sup> .                                                                                            |
| 26. Derivation of themes               | Were themes identified in advance or derived from the data?                                             | Derived from the data.                                                                                                                                                                                                                                                                                       |
| 27. Software                           | What software, if applicable, was used to manage the data?                                              | ATLAS.ti software (ATLAS.ti Scientific Software Development GmbH).                                                                                                                                                                                                                                           |
| 28. Participant checking               | Did participants provide feedback on the findings?                                                      | Discussions were scheduled with three DTx experts at different time intervals who met the study inclusion criteria but were outside the original sample to interpret, validate, and refine emerging versions of the CLD.                                                                                     |
| <b>Reporting</b>                       |                                                                                                         |                                                                                                                                                                                                                                                                                                              |
| 29. Quotations presented               | Were participant quotations presented to illustrate the themes/findings? Was each quotation identified? | Yes.                                                                                                                                                                                                                                                                                                         |
| 30. Data and consistent findings       | Was there consistency between the data presented and the findings?                                      | SD modeling was applied to visualize causal relationships through triangulated data sources, ultimately aiming to achieve a higher degree of internal and external validity, strengthening confidence in the findings.                                                                                       |
| 31. Clarity of major themes            | Were major themes clearly presented in the findings?                                                    | Yes, major themes are clearly identified in the paper, as well as the generative mechanisms underlying observed researchers' decision-making patterns.                                                                                                                                                       |
| 32. Clarity of minor themes            | Is there a description of diverse cases or a discussion of minor themes?                                | No.                                                                                                                                                                                                                                                                                                          |

**Supplementary Table 6: Interview topic guide.**

| Topics                                                              | Guiding topics for discussion                                                                                                                                                                                                                                                                                                                                                                                                                                   |
|---------------------------------------------------------------------|-----------------------------------------------------------------------------------------------------------------------------------------------------------------------------------------------------------------------------------------------------------------------------------------------------------------------------------------------------------------------------------------------------------------------------------------------------------------|
| Background and Opening Topics                                       | <ul style="list-style-type: none"> <li>• Professional background and role in DTx development</li> <li>• Current DTx project(s) context and stage</li> <li>• Professional training influences on economic decision-making approaches</li> </ul>                                                                                                                                                                                                                  |
| Understanding of Economic Value<br>( <i>Real to Actual Domain</i> ) | <ul style="list-style-type: none"> <li>• Personal understanding of DTx economic value</li> <li>• Experience with economic decision-making in DTx projects</li> <li>• Key considerations, priorities and decision-making drivers that guide DTx development</li> <li>• Organizational context and constraints</li> </ul>                                                                                                                                         |
| Contextual Conditions<br>( <i>Actual Domain</i> )                   | <ul style="list-style-type: none"> <li>• Market and regulatory environment</li> <li>• Resource availability and limitations</li> <li>• Stakeholder collaboration, influences and pressures</li> <li>• Organizational incentives and their influence</li> <li>• How uncertainty affects decision-making processes</li> </ul>                                                                                                                                     |
| Practical Implementation<br>( <i>Empirical Domain</i> )             | <ul style="list-style-type: none"> <li>• Specific examples of economic decisions made</li> <li>• Implementation challenges and solutions</li> <li>• Success metrics and evaluation methods</li> <li>• Lessons learned from past decisions</li> <li>• Trade-offs between competing priorities</li> <li>• Balancing clinical versus economic considerations</li> <li>• Role of experience in decision-making</li> <li>• Group decision-making dynamics</li> </ul> |
| Reflection on Practice                                              | <ul style="list-style-type: none"> <li>• Perceived effectiveness of current decision-making approaches</li> <li>• Challenges in translating economic considerations into practice</li> <li>• Tools or support needed for better decision-making</li> <li>• Recognition of potential biases or limitations</li> <li>• Evolution of the decision-making approach over time</li> </ul>                                                                             |
| Closing                                                             | <ul style="list-style-type: none"> <li>• Additional thoughts on economic value considerations</li> <li>• Recommendations for other researchers</li> <li>• Reflections on ideal versus actual decision-making processes</li> </ul>                                                                                                                                                                                                                               |

**Supplementary Table 7: Final codebook.**

| Number | Code Category         | Code                                    | Frequency | Short description                                                                                                                                                      | Primary Sources                                                   |
|--------|-----------------------|-----------------------------------------|-----------|------------------------------------------------------------------------------------------------------------------------------------------------------------------------|-------------------------------------------------------------------|
| 1      | Bias >                | Anchoring                               | 7         | Anchoring to initial estimates, that is, researchers' tendency to rely potentially too heavily on the first piece of information they encounter when making decisions. | DT > BDT based<br>CR > Cognitive constraints                      |
| 2      | Bias >                | Availability heuristic                  | 2         | Related to the tendency to overestimate the likelihood of events based on how easily they come to mind.                                                                | DT > BDT based<br>CR > Cognitive constraints                      |
| 3      | Bias >                | Confirmation bias                       | 7         | Researchers' tendency to search for, interpret, and recall information in a way that confirms existing beliefs.                                                        | DT > BDT based<br>CR > Cognitive constraints                      |
| 4      | Bias >                | Cultural                                | 1         | Influence of cultural background and values on research decisions and interpretations.                                                                                 | Code emerged from Chevannah's (P14) transcript analysis           |
| 5      | Bias >                | Loss aversion                           | -         | Related to the tendency to prefer avoiding losses over acquiring equivalent gains.                                                                                     | CT > BDT based<br>CR > Cognitive constraints                      |
| 6      | Bias >                | Other                                   | 7         | Miscellaneous cognitive biases affecting research decisions that do not fit into other specific categories.                                                            | Code emerged from Eisa's (P4) transcript analysis                 |
| 7      | Bias >                | Overconfidence                          | 14        | Related to the tendency to overestimate one's own abilities, knowledge, and accuracy of predictions.                                                                   | DT > BDT based<br>CR > Cognitive constraints                      |
| 8      | Bias >                | Professional training                   | 21        | Impact of professional education and experience on DTx development processes and related decisions.                                                                    | Code emerged from Eva's (P2) transcript analysis                  |
| 9      | Clinical validation > | Clinical value prioritization           | 150       | Focus on generating evidence of DTx safety, efficacy, and health benefits.                                                                                             | Literature Review<br>CR > Actual Domain                           |
| 10     | Clinical validation > | Clinical trial results                  | 37        | Documented outcomes demonstrating DTx safety and efficacy from trials.                                                                                                 | Literature Review<br>CR > Empirical Domain                        |
| 11     | Clinical validation > | Participant selection                   | 5         | Criteria for choosing appropriate study participants for clinical validation.                                                                                          | Literature Review<br>CR > Actual Domain                           |
| 12     | Clinical validation > | Study design decisions                  | 20        | Methodological choices for validation, including outcome measure selection.                                                                                            | Literature Review<br>DT > EUT based<br>CR > Actual Domain         |
| 13     | Context >             | Healthcare system characteristics       | 10        | Structural aspects of healthcare systems affecting DTx implementation.                                                                                                 | Code emerged from Cheah's (P13) transcript analysis               |
| 14     | Context >             | Market fit                              | 42        | DTx's ability to address significant clinical needs in the target market.                                                                                              | Literature Review                                                 |
| 15     | Context >             | Regulatory influence and considerations | 67        | Impact of potential (or the absence of) guidelines, standards, and requirements on DTx development.                                                                    | Literature Review<br>CR > Real Domain                             |
| 16     | Context >             | Reimbursement considerations            | 42        | Planning for payment and coverage mechanisms.                                                                                                                          | Literature Review<br>DT > BDT based                               |
| 17     | Context >             | Resource-related considerations         | 102       | Constraints in funding, time, expertise, and other development resources (e.g., missing information or expertise needed for                                            | Literature Review<br>DT > BDT based<br>CR > Cognitive constraints |



|    |                      |                                        |     |                                                                                                                                                                                             |                                                         |
|----|----------------------|----------------------------------------|-----|---------------------------------------------------------------------------------------------------------------------------------------------------------------------------------------------|---------------------------------------------------------|
|    |                      |                                        |     | development Knowledge gaps). Defined as constraints on Agency, under CR.                                                                                                                    |                                                         |
| 18 | Context >            | Decision-making >                      | 28  | Environmental and situational factors influencing decision processes.                                                                                                                       | Code emerged from Ezra's (P3) transcript analysis       |
| 19 | DTx development >    | Access                                 | 7   | Considerations related to ensuring equitable access to the DTx solution across user populations.                                                                                            | Code emerged from Chevannah's (P14) transcript analysis |
| 20 | DTx development >    | Diversity of stakeholders              | 104 | Involvement of varied stakeholders in the DTx development process.                                                                                                                          | Code emerged from Emma's (P1) transcript analysis       |
| 21 | DTx development >    | Patient centricity                     | 45  | Focus on incorporating patient needs, preferences, and experiences throughout the DTx development process, ensuring the solution addresses real patient challenges and promotes engagement. | Code emerged from Emma's (P1) transcript analysis       |
| 22 | DTx development >    | Patterns                               | 4   | Recurring approaches in development processes and decision-making.                                                                                                                          | CR > Empirical Domain                                   |
| 23 | DTx development >    | Process                                | 142 | Stages of technological innovation and development.                                                                                                                                         | Code emerged from Emma's (P1) transcript analysis       |
| 24 | Eco. consideration > | Long-term costs                        | 10  | The long-term impact of DTx onto society.                                                                                                                                                   | Code emerged from Christoph's (P12) transcript analysis |
| 25 | Eco. consideration > | Business model                         | 70  | Strategy for DTx monetization and market deployment.                                                                                                                                        | Literature Review                                       |
| 26 | Eco. consideration > | Clinical validation costs              | 6   | Expenses for trials, recruitment, data collection, and analysis.                                                                                                                            | Literature Review                                       |
| 27 | Eco. consideration > | Development costs                      | 14  | Expenses for initial creation and iterative improvements of the DTx.                                                                                                                        | Literature Review<br>DT > EUT based                     |
| 28 | Eco. consideration > | Direct medical and non-medical costs   | 54  | Including costs of pharmaceutical treatment, of the DTx, health resource utilization, intervention-specific training, and participants' time spent on the DTx.                              | Literature Review<br>DT > EUT based                     |
| 29 | Eco. consideration > | Eco. prioritization                    | 94  | Emphasis on economic considerations in development.                                                                                                                                         | Code emerged from Eva's (P2) transcript analysis        |
| 30 | Eco. consideration > | Economic value awareness               | 145 | Researchers' understanding of the concept of economic value (e.g., strategies implemented to ensure economic viability of the DTx)                                                          | Literature Review                                       |
| 31 | Eco. consideration > | Economic evaluation methods            | 66  | Approaches for assessing DTx cost-effectiveness and value, such as cost-benefit analysis (CBA), cost-effectiveness analysis (CEA), or cost-utility analysis (CUA).                          | Literature Review<br>DT > EUT based > HTA               |
| 32 | Eco. consideration > | Funding sources                        | 15  | Available financial resources for DTx development.                                                                                                                                          | Literature Review<br>CR > Real Domain                   |
| 33 | Eco. consideration > | Implementation related                 | 114 | Awareness of practical deployment considerations, such as clinical workflow integration, provider training needs, or support requirements.                                                  | Literature Review<br>DT > EUT based                     |
| 34 | Eco. consideration > | Indirect medical and non-medical costs | 37  | Including costs related to the productivity impact and DTx maintenance.                                                                                                                     | Literature Review<br>DT > EUT based                     |

|    |                          |                                                 |    |                                                                                                                                                                                 |                                                     |
|----|--------------------------|-------------------------------------------------|----|---------------------------------------------------------------------------------------------------------------------------------------------------------------------------------|-----------------------------------------------------|
| 35 | Eco. consideration >     | Influencing factors                             | 16 | Including participants' baseline characteristics, reimbursement rate, treatment adherence, attrition rate, degree of clinical inertia and sustained DTx clinical effectiveness. | Literature Review                                   |
| 36 | Emotional factors >      | Confidence                                      | 6  | Self-assurance in development decisions and approaches.                                                                                                                         | Code emerged from Surya's (P10) transcript analysis |
| 37 | Emotional factors >      | Fear and anxiety                                | 5  | Concerns, worries, or anxieties influencing decision-making processes.                                                                                                          | DT > BDT based                                      |
| 38 | Emotional factors >      | Optimism and hope                               | 7  | Expressions of positive expectations or confidence influencing choices and strategic decisions.                                                                                 | DT > BDT based                                      |
| 39 | Emotional factors >      | Passion and commitment                          | 24 | Indications of personal investment, dedication, or emotional attachment which drive decision-making and persistence.                                                            | DT > BDT based                                      |
| 40 | Emotional factors >      | Pressure and stress                             | 11 | Mentions of time constraints, workload, or external demands affecting decision-making behavior.                                                                                 | DT > BDT based                                      |
| 41 | Knowledge >              | Best practices                                  | 22 | Proven effective methods, techniques, and approaches in DTx development and implementation.                                                                                     | Code emerged from Eva's (P2) transcript analysis    |
| 42 | Knowledge >              | Expert consultation processes                   | 26 | Methods for incorporating subject matter expertise.                                                                                                                             | Literature Review                                   |
| 43 | Knowledge >              | Feedback integration                            | 73 | Incorporation of stakeholder perspectives and input, such as patients and HCPs.                                                                                                 | Literature Review<br>CR > Empirical Domain          |
| 44 | Knowledge >              | Market intelligence utilization                 | 13 | Use of market data in decision-making.                                                                                                                                          | Literature Review                                   |
| 45 | Knowledge >              | Talent development                              | 4  | Strategies and processes for building and maintaining necessary expertise and skills within the development team, including training and knowledge transfer.                    | Code emerged from Cheah's (P13) transcript analysis |
| 46 | Organizational context > | Institutional research priorities and mandates  | 73 | Formal organizational goals directing research focus.                                                                                                                           | Literature Review                                   |
| 47 | Organizational context > | Organizational culture toward commercialization | 48 | Institutional attitudes and practices toward research commercialization.                                                                                                        | Literature Review                                   |
| 48 | Organizational context > | Strategic alignment                             | 3  | Alignment between DTx goals and broader organizational objectives (e.g., level of leadership support).                                                                          | Literature Review                                   |
| 49 | Outcome evaluation >     | Market potential evaluation                     | 19 | Assessment of commercial opportunities, market size and potential, and therefore of the DTx potential value.                                                                    | Literature Review<br>DT > EUT based                 |
| 50 | Outcome evaluation >     | Regulatory outcomes                             | 5  | Considerations related to obtaining regulatory approval in order to commercialize a DTx in specific markets.                                                                    | DT > EUT based<br>CR > Empirical Domain             |
| 51 | Persona >                | Adoption related                                | 91 | Considerations (and concerns) related to DTx uptake by target users.                                                                                                            | Code emerged from Surya's (P10) transcript analysis |

|    |                             |                                             |     |                                                                                                                                                                                                                                                        |                                                                          |
|----|-----------------------------|---------------------------------------------|-----|--------------------------------------------------------------------------------------------------------------------------------------------------------------------------------------------------------------------------------------------------------|--------------------------------------------------------------------------|
| 52 | Persona >                   | Clinicians' mindset                         | 45  | Unique perspectives and decision-making approaches that distinguish clinicians-researchers in their work.                                                                                                                                              | Code emerged from Eva's (P2) transcript analysis                         |
| 53 | Persona >                   | Engineer's mindset                          | 34  | Unique perspectives and decision-making approaches that distinguish engineers-researchers in their work.                                                                                                                                               | Code emerged from Eva's (P2) transcript analysis                         |
| 54 | Persona >                   | Researcher's mindset                        | 34  | Insights and perspectives that characterize researchers' general approach and thought processes.                                                                                                                                                       | Code emerged from Eva's (P2) transcript analysis                         |
| 55 | Persona >                   | Researchers' priorities                     | 108 | Day-to-day priorities of researchers, and therefore key considerations in decision-making processes.                                                                                                                                                   | Code emerged from Emma (P1) transcript analysis                          |
| 56 | Persona >                   | Researchers' role                           | 95  | Interviewee's involvement and contributions across different stages of DTx development and technical lifecycle. It also captures the personal experiences of the researchers with DTx development.                                                     | Code emerged from Emma (P1) transcript analysis<br>CR > Empirical Domain |
| 57 | Probability >               | Probability calculations                    | 10  | Objective and subjective probability calculations.                                                                                                                                                                                                     | Literature Review<br>DT > EUT based                                      |
| 58 | Probability >               | Uncertainty                                 | 13  | Acknowledgment of potential uncertainty.                                                                                                                                                                                                               | Literature Review<br>DT > EUT based                                      |
| 59 | Social influence >          | Competitive pressure                        | 8   | Impact of market competition on decisions.                                                                                                                                                                                                             | DT > BDT based                                                           |
| 60 | Social influence >          | Norms                                       | 30  | Established practices, standards, and unwritten rules that shape behavior within the DTx ecosystem.                                                                                                                                                    | DT > BDT based                                                           |
| 61 | Social influence >          | Peer pressure                               | 3   | Direct and indirect influence exerted by professional peers and industry colleagues on decision-making.                                                                                                                                                | DT > BDT based                                                           |
| 62 | Social influence >          | Status and reputation concerns              | 2   | Decision-making influenced by considerations of professional standing and organizational reputation.                                                                                                                                                   | DT > BDT based                                                           |
| 63 | Stakeholder relationships > | Communications                              | 17  | Related to the communications between the different stakeholder groups.                                                                                                                                                                                | Code emerged from Shiva's (P9) transcript analysis                       |
| 64 | Stakeholder relationships > | Cross-disciplinary collaboration structures | 72  | Formal and informal arrangements for working across different fields of expertise, encompassing collaborative networks that facilitate knowledge exchange.                                                                                             | Literature Review<br>CR > Actual Domain                                  |
| 65 | Stakeholder relationships > | Group and power dynamics                    | 12  | Distribution and exercise of authority in decision-making (e.g., stakeholder alignment issues). It includes the "network effects", i.e., the impact of existing relationships and connections on researchers' decision-making and development choices. | Literature Review<br>CR > Actual Domain                                  |
| 66 | Stakeholder relationships > | Industry-academia relationships             | 21  | Connections and interactions between academic researchers and industry partners.                                                                                                                                                                       | Literature Review<br>CR > Actual Domain                                  |
| 67 | Stakeholder relationships > | PPP dynamics                                | 6   | Public-private partnership interactions and relationships.                                                                                                                                                                                             | Literature Review<br>CR > Actual Domain                                  |
| 68 | Tech. development >         | Features prioritization                     | 10  | Decisions about which features or capabilities to develop first.                                                                                                                                                                                       | Literature Review                                                        |
| 69 | Tech. development >         | Interoperability considerations             | 16  | Ability to integrate with other systems and platforms.                                                                                                                                                                                                 | Literature Review                                                        |

|    |                     |                               |    |                                                                                                         |                                                   |
|----|---------------------|-------------------------------|----|---------------------------------------------------------------------------------------------------------|---------------------------------------------------|
| 70 | Tech. development > | Security and privacy features | 8  | Measures for protecting data and ensuring privacy.                                                      | Literature Review                                 |
| 71 | Tech. development > | Tech. architecture            | 5  | Choices and decisions about technological structure and components.                                     | Literature Review                                 |
| 72 | Tech. development > | Tech. limitations             | 3  | Constraints imposed by technology or infrastructure.                                                    | Literature Review<br>CR > Real Domain             |
| 73 | Tech. development > | Tech. prioritization          | 67 | Focus on technological capability development. It could also be considered as a "pro-innovation bias".  | Code emerged from Emma's (P1) transcript analysis |
| 74 | Tech. development > | User interface                | 12 | Choices affecting how users interact with the DTx (e.g., decisions related to the end-user experience). | Literature Review                                 |
|    |                     |                               |    |                                                                                                         |                                                   |
| 75 | Utility >           | Resource                      | 2  | Resource allocation-related decisions and considerations.                                               | DT > EUT based<br>CR > Actual Domain              |
| 76 | Utility >           | Risk                          | 10 | Notions of risk and uncertainty evaluation.                                                             | DT > EUT based                                    |
| 77 | Utility >           | Scalability                   | 31 | Scalability potential of the future DTx intervention.                                                   | DT > EUT based                                    |
| 78 | Utility >           | Time                          | 1  | Time-value considerations (e.g., specific deadlines).                                                   | DT > EUT based                                    |

**Supplementary Table 8: Illustrative quotes for the three generative mechanisms.**

| Mechanisms                    | Representative Quotes                                                                                                                                                                                                                                                                                                                                                                                                                                                                                                                                                                                                                                                                                                                                                                                                  | Context                              | Interpretation                                                                    |
|-------------------------------|------------------------------------------------------------------------------------------------------------------------------------------------------------------------------------------------------------------------------------------------------------------------------------------------------------------------------------------------------------------------------------------------------------------------------------------------------------------------------------------------------------------------------------------------------------------------------------------------------------------------------------------------------------------------------------------------------------------------------------------------------------------------------------------------------------------------|--------------------------------------|-----------------------------------------------------------------------------------|
| <b>Professional Norms</b>     | <p><i>"As a researcher, my KPIs are focused on publications and clinical validation... economic considerations aren't part of our metrics."</i> (Emma, P1)</p> <p><i>"The priorities would be focused on technical performance and the clinical value this solution can have."</i> (Elisabeth, P5)</p> <p><i>"We were too focused on the clinical service delivery team [and did not engage some of the stakeholders]. So we developed that and then went through a couple of trials. One was a pre-test, post-test study first, now a randomized controlled trial to see whether it really works. At this point, we still have not done cost-benefit analysis. So it may be a money-losing intervention, we don't know, but we may be throwing money into the ocean. So this is one downside."</i> (Camirah, P15)</p> | Discussion of research priorities    | Demonstrates how institutional structure and dynamics shape decision-making focus |
| <b>Researcher Experience</b>  | <p><i>"From my engineering background, I naturally focus on technical performance... economic aspects weren't part of my training."</i> (Ezra, P3)</p> <p><i>"I don't really consider myself an expert in this area at all. I have some knowledge, partly during training, there are specific components of our examinations that cover things like cost effectiveness."</i> (Cheah, P13)</p> <p><i>"It's safer to follow guidelines. That's what we're trained to do throughout our training."</i> (Surya, P10)</p>                                                                                                                                                                                                                                                                                                   | Reflection on professional training  | Shows the influence of educational background on decision frameworks              |
| <b>Adoption Uncertainties</b> | <p><i>"Implementation is always the biggest unknown... you can have perfect clinical results but fail completely in real-world adoption."</i> (Christoph, P12)</p> <p><i>"The kind of the end goal is really about the adoptions, basically, the deployment and the adoptions of these technologies."</i> (Priyah, P17)</p> <p><i>"Besides economics, it's the implementation part, like how do we assess or evaluate the fidelity or the adoption of this kind of program, how do we do stakeholder engagement, how to analyze their responses, how to overcome barriers and facilitators when you look at the big picture."</i> (Camirah, P15)</p>                                                                                                                                                                   | Discussion of development challenges | Illustrates how adoption uncertainty shapes Dtx development-related decisions     |

## Supplementary References

1. Saldaña, J. *The Coding Manual for Qualitative Researchers*. (SAGE Publications Limited, Arizona State University, USA, 2021).
2. Bhaskar, R. *A Realist Theory of Science*. (Routledge, 2008).
3. Putri, A. F., Chandler, C. & Tocher, J. Realist approach to qualitative data analysis. *Nursing Research* **72**, 481 (2023).
4. Khanna, P., Roberts, C., Burgess, A., Lane, S. & Bleasel, J. Unpacking the impacts of programmatic approach to assessment system in a medical programme using critical realist perspectives. *Journal of Critical Realism* **22**, 840–858 (2023).
5. Monaghan, L. F. Employing critical realism within and beyond social studies of health: tenets, applications, possible future research and action. *Journal of Critical Realism* **23**, 274–291 (2024).
6. Oseni, T., Rahim, M. & Foster, S. A realist evaluation of post-implementation modifications: a context-initiative-mechanism-outcome perspective. *Journal of Critical Realism* **22**, 645–669 (2023).
7. Stohr, A., Ollig, P., Keller, R. & Rieger, A. Generative mechanisms of AI implementation: A critical realist perspective on predictive maintenance. *Information and Organization* **34**, 100503 (2024).
8. Danermark, B., Ekstrom, M., Jakobsen, L. & Karlsson, J. ch. *Explaining Society: An Introduction to Critical Realism in the Social*. (Routledge, London, 2005). doi:10.4324/9780203996249.
9. Tversky, A. & Kahneman, D. Judgment under uncertainty: Heuristics and biases. **185(4157)**, 1124–1131 (1974).
10. Raiffa, H. *Decision Analysis: Introductory Lectures on Choices under Uncertainty*. (Addison-Wesley, Oxford, England, 1968).
11. Bleichrodt, H. & Pinto, J. L. A parameter-free elicitation of the probability weighting function in medical decision analysis. *Management Science* **46**, 1485–1496 (2000).
12. Rhodes, T. & Lancaster, K. Evidence-making interventions in health: A conceptual framing. *Social Science & Medicine* **238**, 112488 (2019).
13. Neumann, J. V. & Morgenstern, O. *Theory of Games and Economic Behavior*. (Princeton University Press., 1944).
14. Ruger, J. P. Health, health care, and incompletely theorized agreements: a normative theory of health policy decision making. *J Health Polit Policy Law* **32**, 51–87 (2007).
15. Watkins, S. Effective decision-making: applying the theories to nursing practice. *British Journal of Nursing* <https://www.britishjournalofnursing.com/content/clinical/effective-decision-making-applying-the-theories-to-nursing-practice/> (2020).

16. Buchak, L. Why high-risk, non-expected-utility-maximising gambles can be rational and beneficial: the case of HIV cure studies. *Journal of Medical Ethics* **43**, 90–95 (2017).
17. Kozlowski, D., Hutchinson, M., Hurley, J., Rowley, J. & Sutherland, J. The role of emotion in clinical decision making: an integrative literature review. *BMC Medical Education* **17**, 255 (2017).
18. Takemura, K. Expected utility theory and psychology. in *Behavioral Decision Theory: Psychological and Mathematical Descriptions of Human Choice Behavior* (ed. Takemura, K.) 69–86 (Springer, Singapore, 2021). doi:10.1007/978-981-16-5453-4\_6.
19. Hernandez, J. G. V. & Ortega, R. P. Bounded rationality in decision-making - MedCrave online. *MOJ Research Review* (2019) doi:10.15406/mojrr.2019.02.00047.
20. Weinstein, N. D. Unrealistic optimism about future life events. *Journal of Personality and Social Psychology* **39**, 806–820 (1980).
21. Greenhalgh, T. Five biases of new technologies. *Br J Gen Pract* **63**, 425 (2013).
22. Tripepi, G., Jager, K. J., Dekker, F. W. & Zoccali, C. Selection bias and information bias in clinical research. *Nephron Clinical Practice* **115**, c94–c99 (2010).
23. Kahneman, D. *Thinking, Fast and Slow*. 499 (Farrar, Straus and Giroux, New York, NY, US, 2011).
24. Desmond, C., Brubaker, K. A. & Ellner, A. L. Decision-making strategies: ignored to the detriment of healthcare training and delivery? *Health Psychol Behav Med* **1**, 59–70 (2013).
25. Torbica, A., Fornaro, G., Tarricone, R. & Drummond, M. F. Do social values and institutional context shape the use of economic evaluation in reimbursement decisions? An empirical analysis. *Value Health* **23**, 17–24 (2020).
26. Ozer, J. *et al.* Culture and personal influences on cardiopulmonary resuscitation- results of international survey. *BMC Med Ethics* **20**, 102 (2019).
27. Peters, D. H. The application of systems thinking in health: why use systems thinking? *Health Research Policy and Systems* **12**, 51 (2014).
28. Plsek, P. E. & Greenhalgh, T. The challenge of complexity in health care. *BMJ* **323**, 625–628 (2001).
29. Langley, A., Smallman, C., Tsoukas, H. & Van de Ven, A. H. Process studies of change in organization and management: Unveiling temporality, activity, and flow. *AMJ* **56**, 1–13 (2013).
30. Sterman, J. D. *Business Dynamics: Systems Thinking and Modeling for a Complex World*. (Irwin/McGraw-Hill, Boston, 2000).
31. Sætre, A. S. & Van de Ven, A. Generating theory by abduction. *AMR* **46**, 684–701 (2021).
32. Sapanel, Y. *et al.* A group concept mapping study of stakeholder perspectives on digital therapeutics economic value drivers. *npj Digital Medicine* **8**, 1–9 (2025).
33. Berwick, D. M., Nolan, T. W. & Whittington, J. The Triple Aim: Care, Health, And Cost. *Health Affairs* **27**, 759–769 (2008).

34. Goeldner, M. & Gehder, S. Digital health applications on a fast track: Insights from a data-driven analysis of prescribable digital therapeutics in Germany from 2020 to mid-2024. *J Med Internet Res* **26**, e59013 (2024).
35. Haverinen, J. *et al.* Finnish Digi-HTA assessment model for digital health and an international comparison. in *Digital Health and Wireless Solutions* 309–321 (Springer, Cham, 2024). doi:10.1007/978-3-031-59091-7\_20.
36. Sapanel, Y. *et al.* Economic evaluation associated with clinical-grade mobile app–based digital therapeutic interventions: systematic review. *Journal of Medical Internet Research* **25**, (2023).
37. Segur-Ferrer, J., Moltó-Puigmartí, C., Pastells-Peiró, R. & Vivanco-Hidalgo, R. *Health Technology Assessment Framework: Adaptation for Digital Health Technology Assessment*.  
<https://aquas.gencat.cat/web/.content/minisite/aquas/publicacions/2023/framework-adaptation-digital-hta-redets-aquas2023.pdf> (2023).
38. Fletcher, A. J. Applying critical realism in qualitative research: methodology meets method. *International Journal of Social Research Methodology* **20**, 181–194 (2017).
39. Farquhar, J., Michels, N. & Robson, J. Triangulation in industrial qualitative case study research: Widening the scope. *Industrial Marketing Management* **87**, 160–170 (2020).
40. Clancy, T. Systems thinking: Three system archetypes every manager should know. *IEEE Engineering Management Review* **46**, 32–41 (2018).
41. Senge, P. M. *The Fifth Discipline: The Art and Practice of the Learning Organization*. (Currency Doubleday, 2006).
42. Sánchez, M. A. Exploring the landscape of system dynamics archetypes: A systematic review. *Systems Research and Behavioral Science* **n/a**, (2024).
